# Supplementary material for: Spatial distributions, feeding ecologies, and behavioral interactions of four rabbitfish species (Siganus unimaculatus, S. virgatus, S. corallinus, and S. puellus)
Source: PeerJ. 2018 Dec 20;6:e6145. doi: 10.7717/peerj.6145 (PMC6304264; doi:10.7717/peerj.6145)
Supplement: Supplemental Information 1 [file peerj-06-6145-s002.xlsx]

## Sheet: Sheet1
Density (per 200 m x 5 m)	S. puellus small-size	S. corallinus small-size	S. virgatus small-size	S. unimaculatus small-size	S. puellus medium-size	S. corallinus medium-size	S. virgatus medium-size	S. unimaculatus medium-size	S. puellus large-size	S. corallinus large-size	S. virgatus large-size	S. unimaculatus large-size
KP 1	0	0	0	0	0	0	0	0	0.871573	0.859599	2.01771	1.45661
KP 11	0	0	0	0.146628	0	0	0	0	1.01681	0.384615	0	3.95669
KP 13	0	0	0	0	0	0	0	0	0.806776	1.63617	0	2.81241
KP 14	0	0.131234	0.131234	0	0.405206	0.393701	0.524934	1.72329	0	0.821918	1.36986	1.32384
KP 15	0	0	0	0	0.131234	0.393701	0.378746	0.393701	0.232558	1.73259	1.61631	3.55155
KP 16	0	0.128205	0.128205	0.124378	0.124378	1.25526	0	0	1.27057	1.01799	1.66284	0.25641
KP 17	0	0	0	0	0	0	0	0	0.105042	0	0.583035	0
KP 18	0	0	0	0	0.125	0	0.25	1.0122	1.10976	0.75	1.34451	0.875
KP 20	0	0	0	0	0	0	0	0	0.126582	0.253165	0.379747	0
KP 21	0	0.304878	0	0	0.152439	0.304878	0	0.723872	0	0.418994	0.304878	0.27933
KP 22	0	0	0	0	0	0	0	0	0	0	0.145773	0
KP 26	0	0	0	0	0	0	0	0	0	0	0	0
KP 27	0	0	0	0	0	0	0	0	0.246305	0.144509	0	0
KP 28	0	0.65445	0	0	0	0	0	0	0.13089	0.238095	0.26178	0
KP 29	0	0	0	0	0	0	0	0	0	0.125313	0	0
KP 30	0	0	0	0	0	0	0	0	0.27027	0.675676	0.27027	0
KP 31	0	0	0	0	0	0	0	0	0.240964	2.21324	0	0.394455
KP 32	0	0	0	0	0	0	0	0	0	0.728155	0	0.364078
KP 33	0	0	0	0	0.144928	0.724638	0	0.724638	0	0.763789	0	0.289855
KP 34	0	0	16.0256	0	0.223714	0	0	0	0.160256	1.566	0.111857	1.11857
KP 35	0	0	0	0	0	0	0	0	0.332226	0	0	0.332226
KP 36	0	0	0	0	0	0	0	0	0	0.778073	0	0.512821
KP 37	0	0	0	0	0	0	0	0	0	0	0	0
KP 38	0	0	0	0	0	0	0	0	0.600606	0	0.903614	1.20121
KP 39	0	0	0	0	0	0	0	0	0.474598	0.509635	3.13744	0.509635
KP 40	0	0	0.103306	0	0	0	0	0	0	0.206612	0.414832	0.413223
KP 41	0	0	0	0	0	0	0	0	0	0.284091	0	0.284091
KP 42	0	0	0	0	0.146628	0	0	0	0.293255	0.431528	1.43286	0.431528
KP 43	0	0	0	0.13369	0.26738	0.192308	0	0	0.534759	1.64644	1.05306	0.919375
KP 44	0	0	0	0	0.290698	0	0	0	0.63792	1.68362	0	1.47771
KP 45	0	0.140845	0	0	0.181818	0.704225	0	0.463508	0.363636	2.1178	0	3.18566
KP 5	0	0.124688	0.124688	0.249377	0	0.147059	1.79991	1.42585	0	1.35874	7.2862	2.6951
KP 50	0	1.25	0	1.56843	0.314478	0	0	1.09375	1.09968	2.97666	0	2.66416
KP 51	0	2.04306	0.597015	0.149254	0.298507	0.655738	0.327869	1.80573	0	0.313188	0	3.1906
KP 52	0	0	0	0	0	0	0	0	0	0.55945	0.278552	0.278552
KP 53	1.02469	0.852273	13.3826	9.07036	0.314465	0.943396	3.0437	4.63122	0	2.69886	0.628931	0.598556
KP 54	0.127551	0	2.34114	0	0	0	0.668896	0	0.83612	0	0	0.83612
KP 55	0	0	0	0	0	0	0.393701	0.262467	0	0.660345	4.22036	1.3193
KP 56	0	0	0	0	0.125313	0	0	0	0	0.799669	0	0.972771
KP 57	0	0	0	0	0	0	0	0	0	0	0	0.489225
KP 58	0	0	0	0	0	0	0	0	0	0.241546	0	0
KP 59	0	0	0	0	0	0	0	0	0	0.203252	0	0
KP 60	0	0	0	0	0	0	0	0	0	0.269542	0	0
KP 61	0	0	0	0	0	0	0	0	0	0.398094	0	0
KP 63	0	0	0	0	0	0	0	0	0	1.13713	0	0
KP 64	0	0	0	0	0	0	0	0	0	0.341686	0	0
KP 68	0	0	0	0	0	0	0	0	0	1.57696	1.75566	0.859599
KP 69	0	0.286848	0	0	1.41621	2.66195	0.268817	3.29957	0.878573	0.573695	0.286848	3.0832
KP 7	0	0	0	0	0.149701	0	0	0	0.923785	2.28815	0.316456	1.53964
KP 70	0.783289	0	0	0.31746	0.148368	0.31746	0	2.22222	0.148368	3.58862	0	4.96538
KP 9	0	0	0	0	0	0	0	0.675676	1.02652	1.29679	0.600974	4.87662
P1	0	0	0	0	0	0	0	0.289855	1.74927	0.869565	2.47137	1.45435
P10	0	0	0	0	0.147493	0.576677	0.442478	0	0.294985	1.66293	1.03245	1.03245
P11	0	0	0	0	0	0	0	0	0.160256	2.04465	1.75227	2.06575
P12	0	0	0	0	0	0	0	0	0.15873	0.698324	4.43779	2.22843
P13	0	0.696864	0.348432	5.90044	0.348432	0.522648	1.39373	12.8618	0.867463	0	0.696864	2.946
P2	0	0	0	0	0	0	0.773994	0	1.67409	0.983146	3.29078	2.02369
P3	0	0	0	0	0	0	0.135135	0	0.405405	1.10269	9.77802	0
P4	0	0	0	0	0	0	0	0.433526	0.144509	1.79283	2.31214	1.91776
P5	0.158228	0.167224	0.316456	6.26984	0.167224	0.501672	0.158228	5.92111	0	0.334448	1.82147	0.650904
P7	0.160256	1.5625	0.160256	7.07131	0.641026	1.29708	0.320513	16.4513	0.390625	0.320513	1.44231	1.29708
P8	0.151976	0.303951	0	0.607903	0	0	0.759878	1.19514	0.607903	0.911854	2.59091	2.39028
P9	0	0	0	0	0	0	0	0	0	0.961538	1.0355	1.84911
