# Supplementary material for: Spatial distributions, feeding ecologies, and behavioral interactions of four rabbitfish species (Siganus unimaculatus, S. virgatus, S. corallinus, and S. puellus)
Source: PeerJ. 2018 Dec 20;6:e6145. doi: 10.7717/peerj.6145 (PMC6304264; doi:10.7717/peerj.6145)
Supplement: Supplemental Information 2 [file peerj-06-6145-s003.xlsx]

## Sheet: Sheet1
(A) Site score				(B)				( C ) Species composition							(D) Environmental variables
	CCA axis 1	CCA axis 2			CCA axis 1	CCA axis 2			Group A	Group B	Group C	Group D	Group E			CCA axis 1	CCA axis 2
KP 1	-1.2132	0.2173		S. puellus small-size	1.1282	0.1324		S. puellus small-size	0.0637755	1.02469	0.0796211	0.116908	0		BA	0.5442	0.0709
KP 11	-0.7793	-0.2743		S. corallinus small-size	0.7284	-0.5208		S. corallinus small-size	0	0.852273	1.11741	0.36642	0.00820288		BB	0.54	-0.2639
KP 13	-1.0459	0.0559		S. virgatus small-size	1.1965	1.3276		S. virgatus small-size	9.18339	13.3826	0.35554	0.0164042	0.00742082		DBA	0.7872	-0.1894
KP 14	0.234	-0.251		S. unimaculatus small-size	1.1596	-0.5035		S. unimaculatus small-size	0	9.07036	4.84771	0.311725	0.0136265		DEPTH	0.0235	-0.6858
KP 15	-0.5475	-0.0759		S. puellus medium-size	0.3689	0.0768		S. puellus medium-size	0.111857	0.314465	0.363797	0.322703	0.0352009		DTA	-0.4977	-0.1242
KP 16	-0.3387	0.7169		S. corallinus medium-size	0.4798	0.1591		S. corallinus medium-size	0	0.943396	0.744283	0.550328	0.068109		MA	-0.5337	-0.0515
KP 17	-1.4561	0.4628		S. virgatus medium-size	0.459	0.0256		S. virgatus medium-size	0.334448	3.0437	0.550084	0.194204	0.0869576		R	-0.7865	0.0206
KP 18	-0.4421	-0.2288		S. unimaculatus medium-size	0.6969	-0.3207		S. unimaculatus medium-size	0	4.63122	9.26	1.37281	0.103266		S	-0.4015	0.2369
KP 20	-1.3656	0.4986		S. puellus large-size	-0.4481	0.1298		S. puellus large-size	0.498188	0	0.314522	0.358177	0.334828		Seaweed	0.6579	0.3024
KP 21	0.4817	-1.0352		S. corallinus large-size	-0.4578	0.05		S. corallinus large-size	0.782998	2.69886	0.242037	1.2867	0.821372
KP 22	-1.5085	0.3222		S. virgatus large-size	-0.5564	0.0377		S. virgatus large-size	0.0559284	0.628931	0.990161	0.601784	1.15689
KP 27	-1.2249	0.8502		S. unimaculatus large-size	-0.306	-0.0794		S. unimaculatus large-size	0.977344	0.598556	2.02115	1.87451	1.01119
KP 28	0.2136	-1.8074
KP 29	-1.2412	0.4277
KP 30	-1.2992	0.5663
KP 31	-1.1582	0.299
KP 32	-1.0923	0.0271
KP 33	0.4683	-0.2902
KP 34	1.4575	6.4991
KP 35	-1.0224	0.2151
KP 36	-1.0691	-0.0353
KP 38	-1.1546	0.1017
KP 39	-1.3172	0.2982
KP 40	-0.7402	1.096
KP 41	-1.0355	-0.1256
KP 42	-1.1296	0.2856
KP 43	-0.7533	0.1616
KP 44	-0.8787	0.1971
KP 45	-0.2776	-0.2291
KP 5	-0.1313	-0.2952
KP 50	0.4113	-1.4521
KP 51	1.0618	-0.5459
KP 52	-1.2034	0.1094
KP 53	1.7963	1.2211
KP 54	1.2036	4.6495
KP 55	-0.832	-0.1088
KP 56	-0.8483	-0.0956
KP 57	-0.8298	-0.6789
KP 58	-1.2412	0.4277
KP 59	-1.2412	0.4277
KP 60	-1.2412	0.4277
KP 61	-1.2412	0.4277
KP 63	-1.2412	0.4277
KP 64	-1.2412	0.4277
KP 68	-1.2473	0.1203
KP 69	0.4722	-0.3937
KP 7	-1.0407	0.2451
KP 70	0.3063	-0.6255
KP 9	-0.7203	-0.3089
P1	-1.028	0.1197
P10	-0.5537	0.3436
P11	-1.184	0.0609
P12	-1.2318	0.0395
P13	1.293	-1.4298
P2	-0.9255	0.2555
P3	-1.328	0.4151
P4	-0.9111	-0.1951
P5	1.432	-1.485
P7	1.3735	-1.7224
P8	0.054	-0.8044
P9	-1.1422	-0.0796
