# Supplementary material for: Spatial distributions, feeding ecologies, and behavioral interactions of four rabbitfish species (Siganus unimaculatus, S. virgatus, S. corallinus, and S. puellus)
Source: PeerJ. 2018 Dec 20;6:e6145. doi: 10.7717/peerj.6145 (PMC6304264; doi:10.7717/peerj.6145)
Supplement: Supplemental Information 3 [file peerj-06-6145-s004.xlsx]

## Sheet: Sheet1
Species	S. puellus 1	S. puellus 2	S. puellus 3	S. puellus 4	S. puellus 5	S. puellus 6	S. puellus 7	S. puellus 8	S. puellus 9	S. puellus 10		S. virgatus 1	S. virgatus 2	S. virgatus 3	S. virgatus 4	S. virgatus 5	S. virgatus 6	S. virgatus 7	S. virgatus 8	S. virgatus 9	S. virgatus 10		S. corallinus 1	S. corallinus 2	S. corallinus 3	S. corallinus 4	S. corallinus 5	S. corallinus 6	S. corallinus 7	S. corallinus 8	S. corallinus 9	S. corallinus 10		S. unimaculatus 1	S. unimaculatus 2	S. unimaculatus 3	S. unimaculatus 4	S. unimaculatus 5	S. unimaculatus 6	S. unimaculatus 7	S. unimaculatus 8	S. unimaculatus 9	S. unimaculatus 10
Sampling month	February	February	April	May	July	August	August	August	August	August		June	June	June	July	July	July	July	July	July	July		April	April	April	April	May	May	May	May	August	August		February	February	February	February	February	February	February	February	February	July
Brown other	7.65446	5.2089	0	0	4.30571	0	0	0	0	0		0	0	0	0	0	0.861343	0.613864	0.855776	4.43412	5.96026		6.77488	0	0	8.27986	0	0	0	0	3.70948	0.759627		0.461741	0.39383	0.372539	0.472144	2.73038	0.395704	0.38018	0	0.480538	0.313234
Brown foliose	7.65446	20.8356	2.55363	1.27796	13.9935	0.910747	1.03359	9.99375	12.3457	1.55039		88.9813	84.1121	90.7807	48.4848	68.718	86.1343	61.3864	85.5776	84.2483	53.6424		38.391	52.1392	45.1613	74.5187	58.0556	56.0942	37.8014	17.8571	70.48	75.9627		46.1741	39.383	37.2539	47.2144	24.5734	39.5704	38.018	43.6047	48.0538	31.3234
Brown styloid	0	0	0	0	0	0	0	0	0	0		0.889813	0	0.907807	0	0	0	0	0	0	0		0	2.74417	0	0	3.05556	6.23269	1.98955	0	0	0.759627		0	0	0	0	0	0	0	0	0	0
Brown filamentary	0	0	0	0	3.22928	0	0	0	0	0		0	0	0	0	0	0	0	0	0	0		0	0	0	0	0	0	0	0	0	0		0	0	0	0	0	0	0	0	0	0
Red other	0	0.217037	0	0	0	0	0	0	0	0		0.0693361	1.24611	0.353036	46.0606	2.67237	1.45716	0.697572	0.629247	0.422297	0		1.58786	5.18583	2.32258	0.931484	0	0.179241	0.321543	0	0	0.222951		0.461741	0	0.447046	0.377715	5.11945	4.52233	0.456216	3.27035	0.400449	0.391543
Red foliose	0.273373	0.217037	0.510725	1.72524	7.75027	0	0	0.999375	1.56379	0		4.85353	4.98442	0.353036	0	1.33618	2.91432	1.39514	0.943871	0.844595	2.98013		1.58786	5.18583	4.64516	1.39723	1.23457	0.896203	1.60772	0	1.24688	4.45902		9.23483	3.44601	0.447046	3.77715	20.4778	13.567	22.8108	26.1628	20.0224	15.6617
Red styloid	0	1.7363	0	2.10863	1.93757	10.929	8.26873	8.99438	0.0823045	0.775194		2.08008	6.23053	4.94251	2.42424	1.33618	1.45716	11.1612	1.57312	5.48986	8.34437		28.5815	12.9646	13.9355	6.98613	23.4568	17.0279	30.5466	0	23.6908	17.8361		36.9393	31.0141	44.7046	33.9943	25.5973	27.134	22.8108	3.27035	20.0224	23.4926
Red filamentary	0	0	0	0	0	0	0	0	0	0		0	0	1.41214	0	21.3789	3.88576	0.697572	3.14624	1.68919	0.596026		0	2.59291	2.32258	0	0	0	0	0	0	0		0	0	0	0	0	0	0	0	0	0
Green algae	9.84144	0	0	0	0	0	0	0	0	0		0	0.778816	0.504337	0	0.381767	0.323813	0.398613	0.629247	1.05574	3.97351		22.5829	8.64304	22.5806	6.20989	0.617284	0.407365	1.20579	80.3571	0.311721	0		1.64908	1.64096	1.0644	6.29525	20.4778	2.26116	1.26727	10.9012	6.40718	3.13234
Seagrass	0	0	0	0	0	0	0	0	0	0		0	0	0	0	1.52707	1.94288	19.9306	6.29247	1.05574	23.8411		0	0	0	0	0	0	0	0	0	0		0	0	0	0	0	0	0	3.63372	0	0
Sponge	72.1706	71.7851	92.952	73.8019	62.9709	48.0874	69.7674	52.4672	67.9012	86.8217		2.3112	1.75234	0	3.0303	2.06154	0.582864	1.9532	0	0	0		0.494001	0	5.41935	0	0	0	0	0	0	0		0	0	13.4114	5.90179	0.341297	10.1752	12.6727	4.36047	0.144161	9.39702
Benthic invertebrates	2.40569	0	3.98366	21.0863	5.8127	40.0729	20.9302	27.5453	18.107	10.8527		0.814699	0.895639	0.746419	0	0.587921	0.440386	1.76585	0.352379	0.760135	0.662252		0	10.5445	3.6129	1.67667	13.5802	19.1625	26.5273	1.78571	0.561097	0		5.07916	24.1221	2.2991	1.96726	0.682594	2.37422	1.58408	4.79651	4.46901	16.2882
