# Supplementary material for: Spatial distributions, feeding ecologies, and behavioral interactions of four rabbitfish species (Siganus unimaculatus, S. virgatus, S. corallinus, and S. puellus)
Source: PeerJ. 2018 Dec 20;6:e6145. doi: 10.7717/peerj.6145 (PMC6304264; doi:10.7717/peerj.6145)
Supplement: Supplemental Information 4 [file peerj-06-6145-s005.xlsx]

## Sheet: Sheet1
Feeding rate						Foray size
Average	S. unimaculatus	S. virgatus	S. corallinus	S. puellus		Average	S. unimaculatus	S. virgatus	S. corallinus	S. puellus
Concave	36.1176	1.75	11.0909	6.17647		Concave	4.75473	1	2.67803	1.54363
Flat	6.41176	9.4375	21.1818	4.58824		Flat	1.86667	3.21912	3.70761	1.36275
Convex	1.94118	24.3125	15.1818	4		Convex	1.33333	3.99468	4.3295	1.48739
Standard deviation	S. unimaculatus	S. virgatus	S. corallinus	S. puellus		Standard deviation	S. unimaculatus	S. virgatus	S. corallinus	S. puellus
Concave	5.86169	0.655108	3.12309	1.92169		Concave	0.558202	0.302765	0.595174	0.329879
Flat	2.73332	2.39438	8.59685	1.61805		Flat	0.587841	0.662271	1.54531	0.489313
Convex	1.04484	4.409	3.02059	1.45015		Convex	0.731526	0.527027	1.14573	0.361081
