# Supplementary material for: Spatial distributions, feeding ecologies, and behavioral interactions of four rabbitfish species (Siganus unimaculatus, S. virgatus, S. corallinus, and S. puellus)
Source: PeerJ. 2018 Dec 20;6:e6145. doi: 10.7717/peerj.6145 (PMC6304264; doi:10.7717/peerj.6145)
Supplement: Supplemental Information 5 [file peerj-06-6145-s006.xlsx]

## Sheet: Sheet1
Species	PC axis 1	PC axis 2
S. unimaculatus 1	-0.029882	-0.0150234
S. unimaculatus 2	-0.0371491	-0.0114367
S. unimaculatus 3	-0.0472702	-0.0192217
S. unimaculatus 4	-0.0218506	-0.0504399
S. unimaculatus 5	-0.0284496	-0.0231229
S. unimaculatus 6	-0.049769	-0.0351121
S. unimaculatus 7	-0.0462453	-0.0282453
S. unimaculatus 8	-0.0438666	-0.0296823
S. unimaculatus 9	-0.0370469	-0.00445349
S. unimaculatus 10	-0.0360075	-0.0255584
S. puellus 1	-0.047598	0.0177109
S. puellus 2	-0.0363479	0.0320861
S. puellus 3	-0.0447564	0.021091
S. puellus 4	-0.0570372	0.0238802
S. puellus 5	-0.032519	0.0241726
S. puellus 6	-0.0400866	0.020383
S. puellus 7	-0.0338123	0.00649536
S. puellus 8	-0.0494224	0.0239402
S. puellus 9	-0.0263848	0.0166976
S. puellus 10	-0.0497161	0.0211186
S. corallinus 1	0.0254372	0.00942095
S. corallinus 2	0.0190446	0.011582
S. corallinus 3	0.0107747	0.00782087
S. corallinus 4	0.0364642	0.00444858
S. corallinus 5	0.0227498	-2.16349e-05
S. corallinus 6	0.0400708	0.0228108
S. corallinus 7	0.0643618	-0.0130057
S. corallinus 8	0.0277603	-0.00874986
S. corallinus 9	0.0395478	-0.0131302
S. corallinus 10	0.0243725	0.000624709
S. virgatus 1	0.0465516	-0.000871409
S. virgatus 2	0.049055	0.000822332
S. virgatus 3	0.0298082	0.00887913
S. virgatus 4	0.0683031	-0.0155403
S. virgatus 5	0.0540152	-0.0121994
S. virgatus 6	0.0471969	-0.000133069
S. virgatus 7	0.0451643	0.0157567
S. virgatus 8	0.0491409	0.00518523
S. virgatus 9	0.0621051	-0.00274299
S. virgatus 10	0.033292	0.0137646
