# Supplementary material for: Spatial distributions, feeding ecologies, and behavioral interactions of four rabbitfish species (Siganus unimaculatus, S. virgatus, S. corallinus, and S. puellus)
Source: PeerJ. 2018 Dec 20;6:e6145. doi: 10.7717/peerj.6145 (PMC6304264; doi:10.7717/peerj.6145)
Supplement: Supplemental Information 6 [file peerj-06-6145-s007.xlsx]

## Sheet: Sheet1
	Focal species = S. unimaculatus
		Frequency (%)	Standard deviation
	S. unimaculatus	100	0
	S. virgatus	5.8	12.4
	S. corallinus	16.7	40.8
	S. puellus	0	0
	Focal species = S. virgatus
		Frequency (%)	Standard deviation
	S. unimaculatus	0	0
	S. virgatus	100	0
	S. corallinus	0	0
	S. puellus	0	0
	Focal species = S. corallinus
		Frequency (%)	Standard deviation
	S. unimaculatus	5	15.8114
	S. virgatus	11.1111	33.3333
	S. corallinus	50	54.7723
	S. puellus	0	0
	Focal species = S. puellus
		Frequency (%)	Standard deviation
	S. unimaculatus	0	0
	S. virgatus	6.81818	16.1667
	S. corallinus	0	0
	S. puellus	90.4762	16.4957
