# Supplementary material for: Spatial distributions, feeding ecologies, and behavioral interactions of four rabbitfish species (Siganus unimaculatus, S. virgatus, S. corallinus, and S. puellus)
Source: PeerJ. 2018 Dec 20;6:e6145. doi: 10.7717/peerj.6145 (PMC6304264; doi:10.7717/peerj.6145)
Supplement: Table S1 — Values represent percentage (%) of the food items. For main food items, see Fig. 6. [file peerj-06-6145-s001.xls]

## Sheet: Table S1
Table S1. List of the benthic invertebrates (excluding sponges) that were found as food items in the stomachs of the four rabbitfish species. Values are percentage contents (%). For the main food items, see Figure 4.
Species	Sample no.	Sampling month	Amphipoda	Anthozoa	Ascidiacea	Bivalvia	Bryozoa	Copepoda	Decapoda	Gastropoda	Hydrozoa	Isopoda	Ophiuroidea	Ostracoda	Polychaeta	Radiolaria	Total
Siganus unimaculatus	1	Feb		2.30871			2.30871			0.230871						0.230871	5.07916
	2	Feb		3.44601			20.6761										24.1221
	3	Feb		0.383183			1.91591										2.2991
	4	Feb	1.57381				0				0.393453						1.96726
	5	Feb					0.341297			0.341297							0.682594
	6	Feb				0.339175	1.69587			0.339175							2.37422
	7	Feb	1.26727				0.316817										1.58408
	8	Feb		0.436047			4.36047										4.79651
	9	Feb					4.32484			0.144161							4.46901
	10	Jul				0.626468	15.6617										16.2882
	Average ± SD		0.3 ± 0.6	0.7 ± 1.2		0.1± 0.2	5.2 ± 7.1			0.1 ± 0.1	0.0 ± 0.1					0.0 ± 0.1	6.4 ± 7.7
Siganus corallinus	1	Apr															0
	2	Apr									10.1124			0.432152			10.5445
	3	Apr									3.6129						3.6129
	4	Apr									0.838336				0.838336		1.67667
	5	May	0.123457						0.493827		12.963						13.5802
	6	May					1.71093				17.1093				0.342187		19.1625
	7	May									26.5273						26.5273
	8	May									1.78571						1.78571
	9	Aug						0.311721							0.249377		0.561097
	10	Aug															0
	Average ± SD		0.0 ± 0.0				0.2 ± 0.5	0.0 ± 0.1	0.0 ± 0.2		7.3 ± 9.1			0.0 ± 0.1	0.1 ± 0.3		7.7 ± 9.3
Siganus virgatus	1	Jun		0.11556		0.11556			0.404461			0.17334					0.808921
	2	Jun						0.778816			0.116822						0.895639
	3	Jun	0.453904	0.242082				0.0504337									0.746419
	4	Jul															0
	5	Jul	0.381767							0.206154							0.587921
	6	Jul							0.323813	0.116573							0.440386
	7	Jul	0.358752			0.19532	0.976601						0.19532				1.72599
	8	Jul						0.314624									0.314624
	9	Jul		0.253378						0.253378					0.253378		0.760135
	10	Jul						0.31457		0.331126							0.645695
	Average ± SD		0.1 ± 0.2	0.1 ± 0.1		0.0 ± 0.2	0.1 ± 0.3	0.1 ± 0.3	0.1 ± 0.2	0.1 ± 0.1	0.0 ± 0.0	0.0 ± 0.1	0.0 ± 0.1		0.0 ± 0.0		0.7 ± 0.5
Siganus puellus	1	Feb		1.20284			1.20284										2.40569
	2	Feb															0
	3	Apr		1.32789			1.32789				1.32789						3.98366
	4	May					10.5431				10.5431						21.0863
	5	Jul					4.84392				0.968784						5.8127
	6	Aug					16.0291				24.0437						40.0729
	7	Aug					13.9535				6.97674						20.9302
	8	Aug				1.31168	13.1168				13.1168						27.5453
	9	Aug					1.13169				16.9753						18.107
	10	Aug									10.8527						10.8527
	Average ± SD			0.3 ± 0.5		0.1 ± 0.4	6.2 ± 6.5				8.5 ± 8.2						15.1 ± 12.8
